# Supplementary material for: Fullerenes on a Nanodiamond Platform Demonstrate Antibacterial Activity with Low Cytotoxicity
Source: MDPI journal article supplement (doi:10.3390/pharmaceutics15071984), 2023-07-19
Supplement: s1 [file s1]

## Supplementary materials

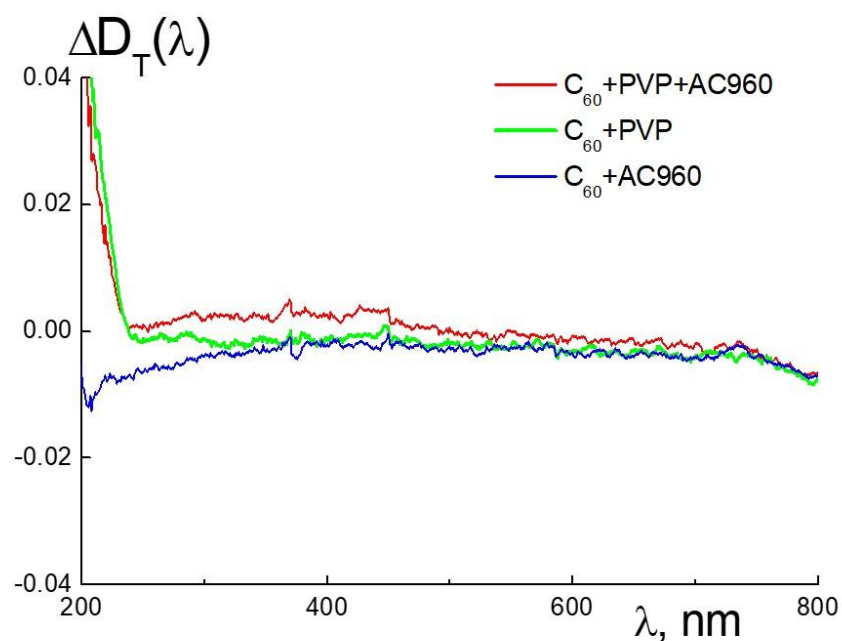

Figure S1. Differences  $\Delta D_T(\lambda) = D(\lambda, T=50^\circ\text{C}) - D(\lambda, T_I)$  between optical density values vs. light wavelength at 50°C and initial temperature for aqueous solutions of ternary and binary complexes.

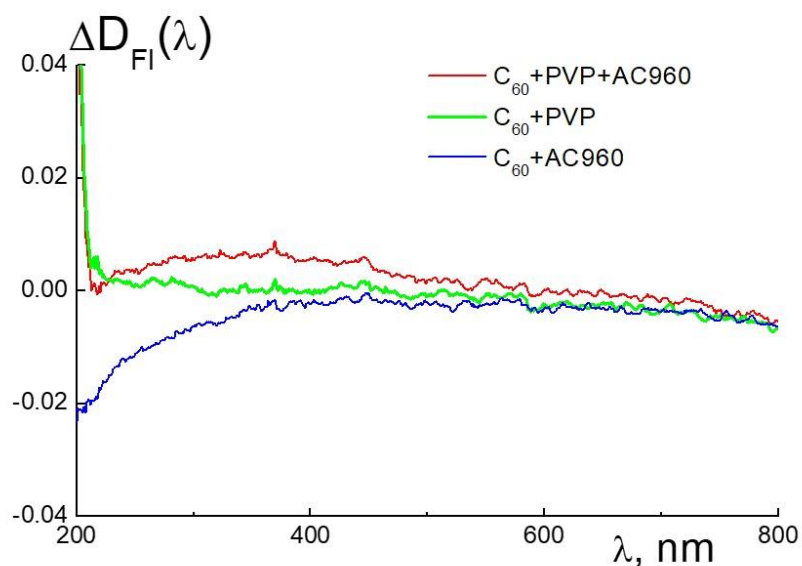

Figure S2. Differences between optical density values  $\Delta D_{FI}(\lambda) = D(\lambda, T_F) - D(\lambda, T_I)$  vs. light wavelength for aqueous solutions of ternary and binary complexes at final ( $T_F = 25^\circ\text{C}$ ) and initial temperature ( $T_I = 23\text{-}24^\circ\text{C}$ ).
